# Supplementary material for: EudraVigilance Medicines Safety Database: Publicly Accessible Data for Research and Public Health Protection
Source: PubMed Central journal article supplement — Drug Saf. 2018 Mar 9;41(7):665–75. doi: 10.1007/s40264-018-0647-1 (PMC5990579; doi:10.1007/s40264-018-0647-1), 2018-03-09
Supplement: 40264_2018_647_MOESM1_ESM.pdf [file 40264_2018_647_MOESM1_ESM.pdf]

## Electronic Supplementary Material

### Article title: *EudraVigilance Medicines Safety Database: Publicly Accessible Data for Research and Public Health Protection*

### Journal: *Drug Safety*

Rodrigo Postigo<sup>1</sup>, Sabine Brosch<sup>1</sup>, Jim Slattery<sup>1</sup>, Anja van Haren<sup>2</sup>, Jean-Michel Dogné<sup>3</sup>, Xavier Kurz<sup>1</sup>, Gianmario Candore<sup>1</sup>, Francois Domergue<sup>1</sup>, Peter Arlett<sup>1</sup>.

Corresponding author: Rodrigo Postigo, EMA, London, UK. rodrigo.postigo@ema.europa.eu

#### Introduction

---

To have an overview about how EudraVigilance (EV) data has been used in research and scientific publications, a search in Embase (1), Pubmed and Pubmed Central (2) was conducted using specific keywords<sup>1</sup>. This provides an illustration of the use of the data with the aim of informing researchers how EV can be utilised. The limitation of this literature review was the fact that drug-related safety issues or other pharmacovigilance topics would have been the main subject of the publications rather than EV; for this reason, the search was performed in three different databases to retrieve as many publications as possible, considering that publications that did not include the search terms as keywords or mentioned them in the abstract, would not be retrieved.

The specific drug-related safety issues retrieved in the literature search are summarised table 1 of this electronic supplementary material including the drugs involved and the databases used for the analysis.

**Table 1.** Description of safety topics analysed in the publications that used EudraVigilance data up to 31 December 2016

| Year | Drugs involved                     | Safety Issue          | Databases                                                  |
|------|------------------------------------|-----------------------|------------------------------------------------------------|
| 2009 | Phosphodiesterase 5 inhibitors (3) | Pulmonary embolism    | EV, Netherlands Pharmacovigilance Centre (Lareb), Vigibase |
| 2010 | Ranibizumab (4)                    | Thromboembolic events | EV, Italian Pharmacovigilance                              |

---

<sup>1</sup> 'eudravigilance' OR 'ev database' OR 'ev data' OR 'ema database' OR 'ema data' OR 'emea database' OR 'emea data' OR 'european medicines agency database' OR 'european medicines agency data' OR 'adrreports' OR 'european database of suspected' OR 'adr database' OR 'adr data' OR 'adverse drug reaction database' OR 'adverse drug reaction data' OR 'adverse reaction database' OR 'adverse reaction data'

---

| Year                   | Drugs involved                                                     | Safety Issue                                                               | Databases                                                                            |
|------------------------|--------------------------------------------------------------------|----------------------------------------------------------------------------|--------------------------------------------------------------------------------------|
|                        |                                                                    |                                                                            | database of spontaneous reports of ADRs                                              |
| 2011/<br>2012          | Pandemic influenza A/H1N1 vaccines (5), (6)                        | Autoimmune disorders                                                       | EV                                                                                   |
| 2012                   | Domperidone (7)                                                    | Cardiac events and potential interacting medications                       | EV, FAERS                                                                            |
| 2013/<br>2014          | Vaccines (8) (9)                                                   | Acute Disseminated Encephalomyelitis                                       | EV, VAERS                                                                            |
| 2013                   | TNF-alpha inhibitors (10)□                                         | Amyotrophic lateral sclerosis                                              | EV                                                                                   |
| 2013,<br>2015          | Rituximab (11), (12)                                               | Melanoma                                                                   | EV, FAERS                                                                            |
| 2013                   | A/H1N1 2009 influenza vaccine (Pandemrix) (13)                     | Epileptic seizures                                                         | Swedish vaccination register, VAERS, EV                                              |
| 2013                   | Golimumab (14)                                                     | Myocardial infarction related events                                       | EV and Vigibase                                                                      |
| 2013                   | Biotechnological drugs prescribed for rheumatoid arthritis (15)    | Characterisation of safety profiles                                        | EV                                                                                   |
| 2014                   | Gadolinium-based contrast agents (16)                              | Nephrogenic systemic fibrosis                                              | EV, FAERS, Danish Medicine Agency, ICNSFR registry, publicly available legal dataset |
| 2014                   | Biologics/biosimilar epoetins (17)                                 | Safety profile compared to the reference product                           | EV                                                                                   |
| 2014                   | Inhaled colistimethate (18)                                        | Thrombocytopenia                                                           | EV, Spanish PV system                                                                |
| 2014,<br>2015,<br>2016 | Bisphosphonates (19), (20), (21)                                   | Cardiac valve disorders                                                    | Electronic healthcare databases (Italy , Netherlands, UK), EV, FAERS                 |
| 2014                   | Non-insulin blood glucose lowering drugs (22)                      | Risks for selected cardiovascular, stroke, pancreatic and bladder outcomes | EV and FAERS                                                                         |
| 2014                   | Biologics approved for the treatment of ocular diseases (23), (24) | Characterisation of safety profiles                                        | EV                                                                                   |
| 2014                   | Naloxone (25)                                                      | Ventricular tachycardia                                                    | EV, Lareb                                                                            |

| Year | Drugs involved                                     | Safety Issue                                              | Databases                                                                                                  |
|------|----------------------------------------------------|-----------------------------------------------------------|------------------------------------------------------------------------------------------------------------|
| 2015 | Antiepileptic drugs (26)                           | Drug reaction with eosinophilia and systemic symptoms     | EV                                                                                                         |
| 2015 | Carbapenems (27)                                   | Seizures                                                  | EV, French PV database                                                                                     |
| 2015 | Set of drugs prescribed in geriatric settings (28) | Taste disorders                                           | EV                                                                                                         |
| 2015 | Trimebutide (29)                                   | TdP (Prediction of proarrhythmia during drug development) | EV                                                                                                         |
| 2015 | Everolimus (30)                                    | Steatosis                                                 | EV, Italian National PV network database                                                                   |
| 2015 | Nicardipine (31)                                   | Acute pulmonary oedema                                    | EV                                                                                                         |
| 2015 | Medicines for rheumatoid arthritis (32)            | Characterisation of the safety profile                    | EV                                                                                                         |
| 2015 | Fingolimod (33)                                    | Characterisation of safety profile                        | EV, Centre for multiple Sclerosis of AOUCity of health and science of Turin                                |
| 2015 | Monoclonal antibodies (34)                         | QT-prolonging effects                                     | EV                                                                                                         |
| 2015 | Levetiracetam (35)                                 | Suicidal behaviour, ideation and attempt                  | EV                                                                                                         |
| 2015 | Immunoglobulins (36)                               | Haemolytic reactions                                      | EV                                                                                                         |
| 2015 | Abiraterone and zoledronic acid (37)               | Toxic epidermal necrolysis                                | EV, electronic medical records (Lanus), records of chemotherapy ordered and dispensed (Farmis and Silicon) |
| 2016 | Pregabalin and gabapentin (38)                     | Gabapentinoid misuse and dependence                       | EV                                                                                                         |
| 2016 | Vemurafenib (39, 40)                               | Acute renal failure                                       | French PV database, EV                                                                                     |
| 2016 | DPP-4 inhibitors (40)                              | Characterisation of safety profiles                       | EV                                                                                                         |
| 2016 | Phenothiazine and antihistamine molecules (41)     | Characterisation of safety profiles                       | EV                                                                                                         |
| 2016 | Cabazitaxel (42)                                   | Interstitial lung disease                                 | EV                                                                                                         |
| 2016 | Clindamycin (43)                                   | Acute generalised exanthematous pustulosis                | EV, Lareb, vigibase                                                                                        |
| 2016 | Clozapine (44)                                     | Cardiomyopathy                                            | EV                                                                                                         |

| Year | Drugs involved                          | Safety Issue                        | Databases                                   |
|------|-----------------------------------------|-------------------------------------|---------------------------------------------|
| 2016 | Dipeptidyl peptidase-IV inhibitors (45) | Bullous pemphigoid                  | EV                                          |
| 2016 | All products in the database (46)       | Interstitial Lung Disease           | EV                                          |
| 2016 | Incretin-based therapy (47)             | Acute cholecystitis                 | EV, Antidiabetic monitoring registry (AIFA) |
| 2016 | Antibiotics (48)                        | Kounis Syndrome                     | EV and Vigilyze                             |
| 2016 | Influenza vaccines (49)                 | Narcolepsy                          | EV                                          |
| 2016 | Statins (50)                            | Muscle rupture                      | EV, Lareb                                   |
| 2016 | Pandemic influenza vaccines (51)        | narcolepsy and/or cataplexy         | EV                                          |
| 2016 | Lamotrigine and valproate (52)          | Characterisation of safety profiles | EV, Norwegian prescription database         |
| 2016 | Oxaliplatin (53)                        | QT interval prolongation            | EV, CredibleMeds                            |
| 2016 | Antiobesity medicines (ATC A08A) (54)   | Characterisation of safety profiles | EV                                          |
| 2016 | Vaccines (55)                           | Vasculitis                          | EV, VAERS, Vigibase                         |

1. Embase [Internet]. [accessed 13 February 2017]. Available from: <https://www.embase.com>.
2. National Center for Biotechnology Information [Internet]. [accessed 14 February 2017]. Available from: <https://www.ncbi.nlm.nih.gov>.
3. Gerritsen RF, Bijl A, Van Puijenbroek EP. Phosphodiesterase 5 inhibitors (PDE5i) and pulmonary embolism. *Basic and Clinical Pharmacology and Toxicology*. 2009;105:87-8.
4. Cutroneo PM, Sottosanti L, Moretti U, Ferrazin F, Russo A, Caputi AP. Thromboembolic events or stroke related to intravitreal injections of ranibizumab: A signal from italian pharmacovigilance system. *Drug Safety*. 2010;33(10):932.
5. Isai A, Le Meur S, Hidalgo Simon A, Arlett P, Kurz X. Risk of autoimmune disorders after immunisation with influenza A/H1N1 vaccines with and without adjuvant: Preliminary results from EudraVigilance. *Drug Safety*. 2011;34(10):922-3.
6. Isai A, Durand J, Le Meur S, Hidalgo-Simon A, Kurz X. Autoimmune disorders after immunisation with Influenza A/H1N1 vaccines with and without adjuvant: EudraVigilance data and literature review. *Vaccine*. 2012;30(49):7123-9.
7. Deepak P, Ehrenpreis ED, Sadozai Y, Sifuentes H. Co-prescription of interacting medications, arrhythmias and treatment with domperidone. *Gastroenterology*. 2012;142(5):S841-S2.
8. Pellegrino P, Carnovale C, Perrone V, Pozzi M, Antoniazzi S, Clementi E, et al. Acute Disseminated Encephalomyelitis Onset: Evaluation Based on Vaccine Adverse Events Reporting Systems. *PLoS ONE*. 2013;8(10).
9. Alicino C, Infante MT, Gandoglia I, Miolo N, Mancardi GL, Zappettini S, et al. Acute disseminated encephalomyelitis with severe neurological outcomes following virosomal seasonal influenza vaccine. *Hum Vaccin Immunother*. 2014;10(7):1969-73.
10. Borjesson A, Grundmark B, Olaisson H, Waldenlind L. Is there a link between amyotrophic lateral sclerosis and treatment with TNF-alpha inhibitors? *Ups J Med Sci*. 2013;118(3):199-200.
11. Peuvrel L, Chiffolleau A, Quereux G, Brocard A, Saint-Jean M, Batz A, et al. Melanoma and rituximab: an incidental association? *Dermatology*. 2013;226(3):274-8.

12. Melanoma associated with rituximab: A RADAR (Research on Adverse Drug events And Reports) project. *Journal of the American Academy of Dermatology*. 72(5):AB209.
13. Arnheim-Dahlström L, Hällgren J, Weibull CE, Sparén P. Risk of presentation to hospital with epileptic seizures after vaccination with monovalent AS03 adjuvanted pandemic A/H1N1 2009 influenza vaccine (Pandemrix): self controlled case series study. *The BMJ*. 2012; 345:e7594.
14. Simunovic M, Margan Koletic Z, Macolic Sarinic V, Krnic D. Vigibase and eudravigilance: Impact on signal detection of myocardial infarction and myocardial infarction related events. *Drug Safety*. 2013;36(9):885-6.
15. Papadopoulos I, Demetzos K, Markantoni-Kyroudi S, Souliotis K, Vozikis A. Bio-tech: An innovative approach for rheumatoid arthritis, their adverse drug reactions constitute problem. *Drug Safety*. 2013;36(9):912.
16. Edwards BJ, Laumann AE, Nardone B, Miller FH, Restaino J, Raisch DW, et al. Advancing pharmacovigilance through academic-legal collaboration: The case of gadolinium-based contrast agents and nephrogenic systemic fibrosis - A research on adverse drug events and reports (RADAR) report. *British Journal of Radiology*. 2014;87(1042).
17. Marin JG, Leung M, Lo C, Tsao NW, Martinusen DJ. Efficacy and safety data of subsequent entry biologics pertinent to nephrology practice: a systematic review. *Can J Kidney Health Dis*. 2014;1:34.
18. Umerez M, Gayan M, Ercilla M, Ripa C, Carmona P, Barral JOSU, et al. Inhaled sodium colistimethate-associated thrombocytopenia. A case report. *European Journal of Hospital Pharmacy*. 2014;21:A164.
19. Coloma PM, De Ridder M, Rijnbeek P, Mosseveld M, Bezemer I, Herings RMC, et al. Risk of cardiac valve disorders with use of bisphosphonates. *Pharmacoepidemiology and Drug Safety*. 2014;23:380-1.
20. Ali AK. Treatment with some bisphosphonates is associated with aortic and mitral valve calcification. *Value in Health*. 2015;18(3):A152.
21. Coloma PM, de Ridder M, Bezemer I, Herings RMC, Gini R, Pecchioli S, et al. Risk of cardiac valvulopathy with use of bisphosphonates: a population-based, multi-country case-control study. *Osteoporosis International*. 2016;27(5):1857-67.
22. Hazell L, Schmedt N, Scotti L, Leal I, Trifiro G, Sturkenboom M, et al. Safeguard results: Analysis of pharmacovigilance databases. *Pharmacoepidemiology and Drug Safety*. 2014;23:38-9.
23. Penedones A, Mendes D, Alves C, Batel Marques F. Safety monitoring of ophthalmic biologics: A systematic review of pre- and postmarketing safety data. *Journal of Ocular Pharmacology and Therapeutics*. 2014;30(9):729-51.
24. Penedones A, Mendes D, Alves C, Batel-Marques F. Safety monitoring of ophthalmic biologics: A systematic review of pre- and post-marketing safety data. *Drug Safety*. 2014;37(10):862-3.
25. Lameijer H, Azizi N, Ligtenberg JJM, Ter Maaten JC. Ventricular Tachycardia After Naloxone Administration: a Drug Related Complication? Case Report and Literature Review. *Drug Safety - Case Reports*. 2014;1(1):2.
26. Renda F, Marchione P, Di Girolamo M, Catalano L, Bertini Malgarini R, Pimpinella G. Drug reaction with eosinophilia and systemic symptoms (DRESS) and antiepileptic drugs (AEDS): A case-non case approach from European pharmacovigilance database. *Drug Safety*. 2015;38(10):1001.
27. Cros C, Taurin S, Cardiet I, Tattevin P, Polard E. Drug safety data to improve drug good use: An example with carbapenems. *Fundamental and Clinical Pharmacology*. 2015;29:23.
28. Joyau C, Veyrac G, Delamarre Damier F, Pasquier A, Priez J, Jolliet P. Drug-induced taste disorders: Prescribing analysis in French nursing homes. *European Geriatric Medicine*. 2015;6:S141.
29. Polak S, Pugsley MK, Stockbridge N, Garnett C, Wisniowska B. Early Drug Discovery Prediction of Proarrhythmia Potential and Its Covariates. *AAPS J*. 2015;17(4):1025-32.
30. Scaldaferrri M, Castellana E, Crosasso P, Cattel F, Grossi E, Arvat E, et al. DI-071 Everolimus (AFINITOR): a case of steatosis in the treatment of pancreatic neuroendocrine tumours. *European Journal of Hospital Pharmacy*. 2015;22(Suppl 1):A102-A.
31. Melis M, Cupelli A, Sottosanti L, Buccellato E, Biagi C, Vaccheri A, et al. Off-label use of nifedipine as tocolytic and acute pulmonary oedema: a post-marketing analysis of adverse drug reaction reports in EudraVigilance. *Pharmacoepidemiol Drug Saf*. 2015;24(11):1220-4.
32. Papadopoulos G, Demetzos K, Markantoni-Kyroudi S, Souliotis K. Pharmacovigilance and pharmacoconomics: the burden of pharmacovigilance on the health system, rheumatoid arthritis as an example. *Drug Safety*. 2015;38(10):944.
33. Castellana E, Crosasso P, Cavalla P, Stecca S. Pharmacovigilance in clinical practice as a support in the definition of the safety profile of fingolimod: Analysis of medical records and adverse drug reactions at the City Health and Science - Molinette - Turin. *Giornale Italiano di Farmacia Clinica*. 2015;29(4):222-30.

34. Jackson T, Kondic J, Seebeck J. QT-prolonging effects of monoclonal antibody drugs in humans: a systematic review of two literature and a public adverse event database. *Int J Clin Pharmacol Ther.* 2015;53(9):705-11.
35. Joyau C, Serandour N, Kenzi A, Mahé J, Ruellan AL, Veyrac G, et al. Suicidal attempt and levetiracetam: A case report. *Fundamental and Clinical Pharmacology.* 2015;29:52.
36. Bellac CL, Hottiger T, Jutzi MP, Bögli-Stuber K, Sängler M, Hanschmann KM, et al. The role of isoagglutinins in intravenous immunoglobulin-related hemolysis. *Transfusion.* 2015;55:S13-S22.
37. Rodriguez Legazpi I, Garcia Verde MJ, Fuster Sanjurjo L, Rodriguez Penin I, Gonzalez Rodriguez AM. Toxic epidermal necrolysis probably due to chemotherapy: A case report. *European Journal of Hospital Pharmacy.* 2015;22:A89.
38. Chiappini S, Schifano F. A Decade of Gabapentinoid Misuse: An Analysis of the European Medicines Agency's 'Suspected Adverse Drug Reactions' Database. *CNS Drugs.* 2016;30(7):647-54.
39. Agier MS, Pichon E, Cottin J, Auffret M, Triquet L, Jonville-Bér AP. Acute renal failure associated with vemurafenib: Analysis of the French pharmacovigilance database. *Fundamental and Clinical Pharmacology.* 2016;30:63.
40. Matos C, Pestana A, Pereira R. Adverse drug reactions related to DPP-4 inhibitors - A review. *Pharmacoepidemiology and Drug Safety.* 2016;25:430.
41. Cirronis M, Conte M, Lanzi C, Moschini M, Vannacci A, Masini E. Are phenothiazine-related adverse drug reactions (ADRS) comparable with antihistamine-related ADRS? *Inflammation Research.* 2016;65:S46.
42. Simon C, Blonz C, Pichon E, Agier MS, Narciso B, Jonville-Bera AP. Cabazitaxel induces recurrence of interstitial lung disease associated with docetaxel. *Fundamental and Clinical Pharmacology.* 2016;30:64-5.
43. Smeets TJL, Jessurun N, Härmark L, Kardaun SH. Clindamycin-induced acute generalised exanthematous pustulosis: Five cases and a review of the literature. *Netherlands Journal of Medicine.* 2016;74(10):421-8.
44. Lertxundi U, Hernández R, Cibrian F, García M, Aguirre C. Clozapine induced cardiomyopathy in Parkinson's disease. *European Geriatric Medicine.* 2016;7:S253-S4.
45. García M, Aranburu MA, Palacios-Zabalza I, Lertxundi U, Aguirre C. Dipeptidyl peptidase-IV inhibitors induced bullous pemphigoid: a case report and analysis of cases reported in the European pharmacovigilance database. *J Clin Pharm Ther.* 2016;41(3):368-70.
46. Pinheiro L, Blake K, Januskiene J, Yue QY, Arlett P. Geographical variation in reporting Interstitial Lung Disease as an adverse drug reaction: findings from an European Medicines Agency analysis of reports in EudraVigilance. *Pharmacoepidemiol Drug Saf.* 2016;25(6):705-12.
47. Pizzimenti V, Giandalia A, Cucinotta D, Russo GT, Smits M, Cutroneo PM, et al. Incretin-based therapy and acute cholecystitis: a review of case reports and EudraVigilance spontaneous adverse drug reaction reporting database. *J Clin Pharm Ther.* 2016;41(2):116-8.
48. Renda F, Marotta E, Landoni G, Belletti A, Cuconato V, Pani L. Kounis syndrome due to antibiotics: A global overview from pharmacovigilance databases. *International Journal of Cardiology.* 2016;224:406-11.
49. Ahmed SS, Steinman L. Mechanistic insights into influenza vaccine-associated narcolepsy. *Human Vaccines and Immunotherapeutics.* 2016;12(12):3196-201.
50. Ekhardt C, de Jong L, Gross-Martirosyan L, van Hunsel F. Muscle rupture associated with statin use. *Br J Clin Pharmacol.* 2016;82(2):473-7.
51. Gadroen K, Straus SMJM, Pacurariu A, Weibel D, Kurz X, Sturkenboom MCJM. Patterns of spontaneous reports on narcolepsy following administration of pandemic influenza vaccine; a case series of individual case safety reports in Eudravigilance. *Vaccine.* 2016;34(41):4892-7.
52. Lima M, Baftiu A, Svendsen K, Johannessen I, Johannessen LC. Pharmacovigilance of lamotrigine and valproate in Norway, 2004-2013. *Epilepsia.* 2016;57:184.
53. Hancox JC, Caves RE, Choisy SCM, James AF. QT interval prolongation and torsades de pointes with oxaliplatin. *Therapeutic Advances in Drug Safety.* 2016;7(6):261-3.
54. Aagaard L, Hallgreen CE, Hansen EH. Serious adverse events reported for antiobesity medicines: Postmarketing experiences from the EU adverse event reporting system EudraVigilance. *International Journal of Obesity.* 2016;40(11):1742-7.
55. Felicetti P, Trotta F, Bonetto C, Santuccio C, Brauchli Pernus Y, Burgner D, et al. Spontaneous reports of vasculitis as an adverse event following immunization: A descriptive analysis across three international databases. *Vaccine.* 2016;34(51):6634-40.
